# Supplementary material for: Titin kinase is an inactive pseudokinase scaffold that supports MuRF1 recruitment to the sarcomeric M-line
Source: PubMed Central journal article supplement (PMC4042850; doi:10.1098/rsob.140041), 2014-05-21
Supplement: rsob140041supp1.pdf [file rsob140041supp1.pdf]

# Titin kinase is an inactive pseudokinase scaffold that supports MuRF1 recruitment to the sarcomeric M-line

Julijus Bogomolovas<sup>1,2</sup>, Alexander Gasch<sup>1</sup>, Felix Simkovic<sup>2</sup>, Daniel J Rigden<sup>2</sup>, Siegfried Labeit<sup>1</sup>, Olga Mayans<sup>2\*</sup>

## Supplementary Materials

### Fig S1: Overall fold representation of TK

The catalytic kinase core is shown in blue with an accompanying surface representation. The C-terminal regulatory domain (CRD) is colored yellow and its  $\alpha$ R2 helix, that binds deeply into the ATP binding cavity, is indicated with a pointer. The lysine residue central to ATP binding and catalysis (K36), the putative catalytic aspartate residue (D127) and the inhibitory tyrosine from the P+1 loop (Y170) are displayed.

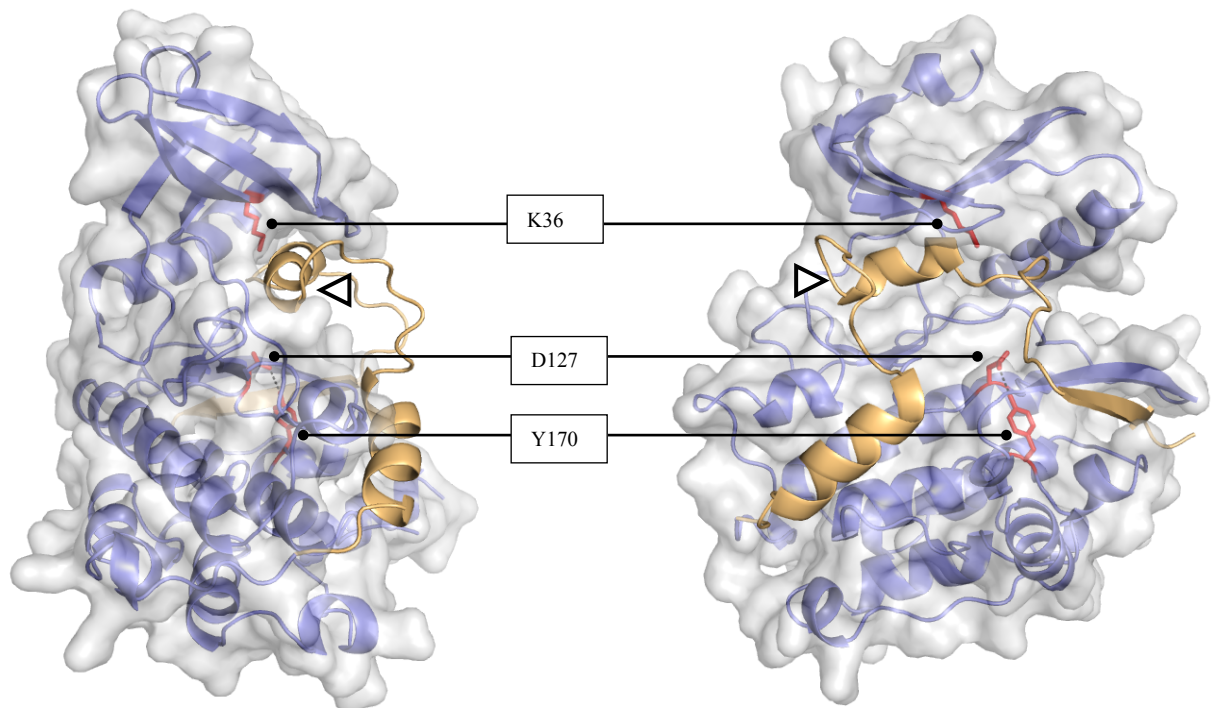

### Section S2: Stability study of TK and its variants TK<sup>K36A</sup> and TK<sup>K36L</sup>

**Methods:** Energy changes ( $\Delta\Delta G$ ) for the replacement of lysine K36 in the ATP-binding pocket with each possible amino acid type were estimated using FoldX (1). Experimental protein stability for selected mutated variants was derived from differences in their melting temperature ( $T_m$ ) monitored by Differential Scanning Fluorimetry (DFS). DFS measurements were performed using a Mx3005p RT-PCR machine (Stratagene). Purified TK, TK<sup>K36A</sup> and TK<sup>K36L</sup> samples were assayed in 25  $\mu$ l buffer consisting of 10 mM HEPES pH 7.5, 150 mM NaCl in 96-well plates. SYPRO-Orange (Invitrogen) was added at a dilution 1:1000. Fluorescence was monitored

( $\lambda_{ex}=465$  nm,  $\lambda_{em}=590$  nm) from 25 °C to 85 °C at 1 °C/min increment. Each measurement was done in triplicate and  $T_m$  values determined using a modified Boltzmann equation with linear correction of baseline drifts (2).

### Fig S2: Stability of TK lysine mutants

**a.** Energy changes ( $\Delta\Delta G$ ) for the replacement of lysine K36 by every other amino acid calculated using FoldX. The values confirm observations that the conventional replacement of K36 to alanine is poorly tolerated leading to the destabilization of the TK fold. A replacement of this residue by leucine, however, is predicted to agree well with the structure of TK; **b.** DSF denaturation traces recorded at  $\lambda_{em}=590$  nm. Substitution of K36 for alanine (TK<sup>K36A</sup>) had a destabilizing effect ( $\Delta T_m= 6.6$  °C) on TK, whereas the stability of TK<sup>K36L</sup> ( $\Delta T_m= 2.2$  °C) was approximately equivalent to that of wild-type TK.

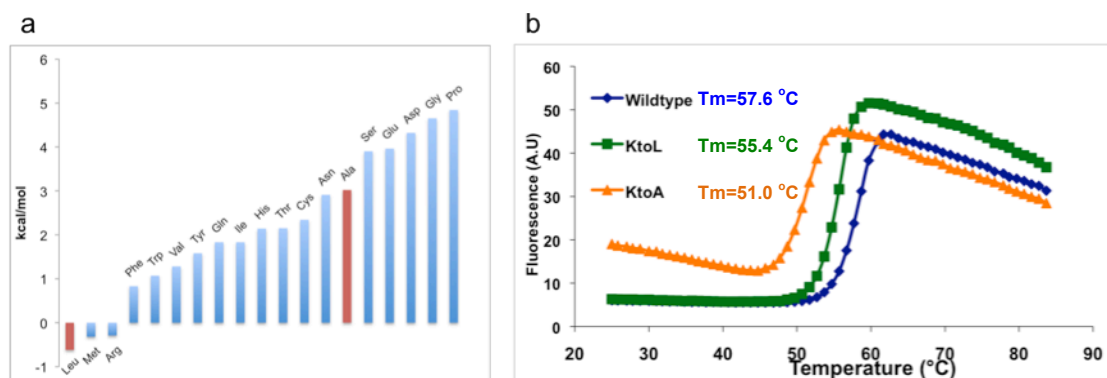

### Section S3: Production of anti-TK and anti-MuRF1 antibodies

**Production of antibodies:** Antigen affinity purified rabbit antibodies against a synthetic peptide corresponding to amino acids 2-15 of MuRF1 or amino acids 163-177 of TK were obtained from BioGenes (Berlin, Germany).

**Dot blot assay:** TK was expressed in *E. coli* with an N-terminal hexahistidine-tag, purified on Ni<sup>2+</sup>-NTA agarose, and then spotted on nitrocellulose membranes pre-wetted with TBS (approximately 1  $\mu$ g each). Filters were incubated with purified rabbit antibodies, N-terminal MuRF1-peptide (a) or TK (b), followed by incubation with Alkaline Phosphatase coupled anti-rabbit antibodies. Blocking and antibody incubations were in TBST/5% BSA and washes in TBST.

**Figure S3: Dot blot assays of anti-TK and anti-MuRF1 antibodies.** anti-MuRF1 antibodies (a) recognize the spotted MuRF1 sample, but not the TK constructs, whereas anti-TK antibodies recognize TK, but not MuRF1 or titin Ig/Fn3 domains (titin sample).

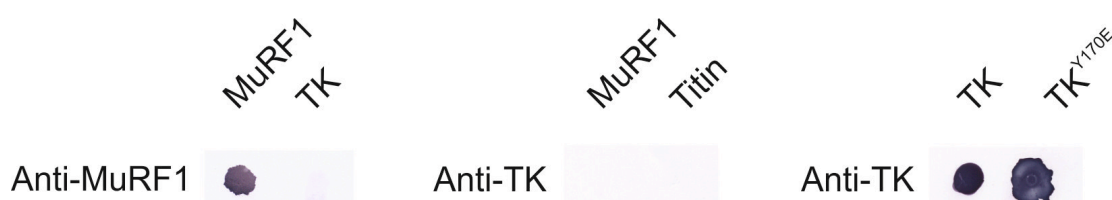

**Fig S4: Phospho-transfer activity does not segregate with TK in purification**

*In vitro* Tcap phosphorylation assays using **a.** partially purified TK samples after one-step affinity chromatography and **b.** TK samples thoroughly purified using the three-step chromatography protocol described in Methods. Both a. and b. show: Coomassie stained SDS-PAGE of reaction mixture (left), autoradiogram of phosphorylated samples (center) and SDS-PAGE of the TK sample prior to being added to the reaction mixture (right). A same amount of total protein content (as estimated using  $A_{280}$ ) was used in both experiments; **c.** Densitogram showing a quantification of Tcap phosphorylation according to autoradiograms obtained in carefully matched experimental set-ups to allow for comparison. Namely, a same amount of total protein (0.5  $\mu\text{g}$ ), radioactivity (0.2  $\mu\text{Ci}$ ) and substrate/additives was used per reaction; equivalent pre-cast commercial gels (NuPAGE®, Invitrogen) were used; gels were always exposed for 6 hrs upon drying following a same protocol and images obtained using the same scanning parameters in the same imaging machine. The quantitation shows that purified TK samples displayed an estimated 80-fold less phosphor-transfer activity than partially pure TK samples. A contaminant (red pointer) co-purifies with TK at low levels. This contaminant has a Mw slightly over 62 kDa (referenced to Mw markers). We speculate that this might be the kinase acting on Tcap, but could not rule out that might be a chaperone or other host protein binding to TK. Efforts to identify this protein through proteomic approaches were not successful as the genome of *Spodoptera frugiperda* is not available.

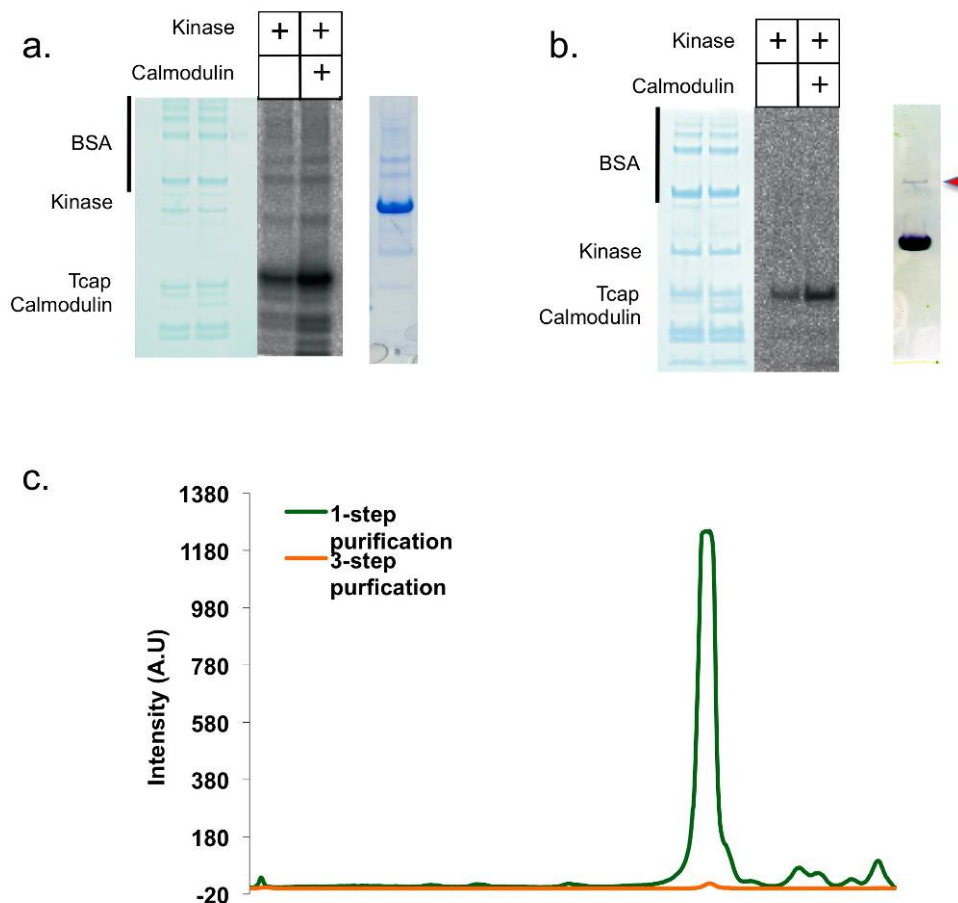

**Fig S5: Sequence conservation of VAIK and DFG motifs in TK-like kinases from vertebrates and invertebrates.**

| <b>Vertebrate titins</b>   | <b>VAIK</b>                         | <b>DFG</b>                  |
|----------------------------|-------------------------------------|-----------------------------|
| Homo_sapiens               | CVETSSKKT <b>YMAK</b> FVKVKGTDQVLVK | .... TIKII <b>EF</b> GQARQL |
| Ailuropoda_melanoleuca     | CVETSSKKT <b>YMAK</b> FVKVKGTDQVLVK | .... TIKII <b>EF</b> GQARQL |
| Anolis_carolinensis        | CVETATKKT <b>YLA</b> KFVKVKGADQVLVK | .... IIKII <b>EF</b> GQARQL |
| Bos_taurus                 | CVETSSKKT <b>YMAK</b> FVKVKGTDQVLVK | .... TIKII <b>EF</b> GQARQL |
| Callithrix_jacchus         | CVETSSKKT <b>YMAK</b> FVKVKGTDQVLVK | .... TIKII <b>EF</b> GQARQL |
| Canis_familiaris           | CVETSSKKT <b>YMAK</b> FVKVKGTDQVLVK | .... IIKII <b>EF</b> GQARQL |
| Cavia_porcellus            | CVETSSKKT <b>FMAK</b> FVKVKGTDQVLVK | .... VIKII <b>EF</b> GQARQL |
| Danio_rerio_A              | CIETSSEKT <b>YMAK</b> FVKVKGADQALVK | .... NVKII <b>EL</b> GQSRHL |
| Danio_rerio_B              | SIEISSKKT <b>FLAK</b> FIKVKGADRELV  | .... TIKII <b>EM</b> GQARLL |
| Dasyopus_novemcinctus      | CVETSSKKT <b>YMAK</b> FVKVKGTDQVLVK | .... TIKII <b>EF</b> GQARQL |
| Dipodomys_ordii            | CVETSSKKT <b>FMAK</b> FVKVKGTDQVLVK | .... TIKII <b>EF</b> GQARQL |
| Echinops_telfairi          | CVETSSKKT <b>YMAK</b> FVKVKGTDQVLVK | .... TIKII <b>EF</b> GQARQL |
| Equus_caballus             | CVETSSKKT <b>YMAK</b> FVKVKGTDQVLVK | .... VIKII <b>EF</b> GQARQL |
| Erinaceus_europaeus        | CVETSSKKT <b>YMAK</b> FVKVKGTDQVLVK | .... IIKII <b>EF</b> GQARQL |
| Felis_catus                | CVETSSKKT <b>YMAK</b> FVKVKGTDQVLVK | .... SIKII <b>EF</b> GQARQL |
| Gadus_morhua_A             | CVEIATKKT <b>FMAK</b> FIKVKGDRELV   | .... ELKII <b>EM</b> GQARLL |
| Gadus_morhua_B             | CVEKSSERT <b>YMAK</b> FVKVKGADQAIK  | .... NVKII <b>EL</b> GQCRHL |
| Gallus_gallus              | CVEAVSKKT <b>YLA</b> KFVKVKGADQVLVK | .... VVKIV <b>EF</b> GQARQL |
| Gasterosteus_aculeatus_A   | CVEIATKKT <b>FMAK</b> SIKVKGTDRELV  | .... TTKII <b>EM</b> GQARLL |
| Gorilla_gorilla            | CVETSSKKT <b>YMAK</b> FVKVKGTDQVLVK | .... TIKII <b>EF</b> GQAHQL |
| Ictidomys_tridacemlineatus | CVETSSKKT <b>FMAK</b> FVKVKGTDQVLVK | .... TIKII <b>EF</b> GQARQL |
| Latimeria_chalumnae        | CVETSSKKT <b>YMAK</b> FVKVKGADQVLVK | .... LVKII <b>EL</b> GQARQL |
| Loxodonta_africana         | CVETSSKKT <b>FMAK</b> FVKVKGTDQVLVK | .... TVKII <b>EF</b> GQARQL |
| Macaca_mulatta             | CVETSSKKT <b>YMAK</b> FVKVKGTDQVLVK | .... TIKII <b>EF</b> GQARQL |
| Macropus_eugenii           | CVETSSKKT <b>YMAK</b> FVKVKGTDQVLVK | .... VIKII <b>EF</b> GQARQL |
| Meleagris_gallopavo        | CVEAVSKKT <b>YLA</b> KFVKVKGADQVLVK | .... VVKIV <b>EF</b> GQARQL |
| Microcebus_murinus         | CVETSSKKT <b>YMAK</b> FVKVKGTDQVLVK | .... TIKII <b>EF</b> GQARQL |
| Monodelphis_domestica      | CVETSSKKT <b>YMAK</b> FVKVKGTDQVLVK | .... TIKII <b>EF</b> GQARQL |
| Mus_musculus               | CVETSSKKT <b>FMAK</b> FVKVKGTDQVLVK | .... TIKII <b>EF</b> GQARQL |
| Myotis_lucifugus           | CVETSSKKT <b>YMAK</b> FVKVKGTDQVLVK | .... VIKII <b>EF</b> GQARQL |
| Nomascus_leucogenys        | CVETSSKKT <b>YMAK</b> FVKVKGTDQVLVK | .... TIKII <b>EF</b> GQARQL |
| Ochotona_princeps          | CVETSSKKT <b>FMAK</b> FVKVKGTDQVLK  | .... VIKII <b>EF</b> GQARQL |
| Oreochromis_niloticus      | CVEISSEKT <b>YMAK</b> FVKVKGADQTLVK | .... NVKII <b>EL</b> GQSRHL |
| Ornithorhynchus_anatinus   | CVETSSKKT <b>YMAK</b> FVKVKGTDQVLVK | .... TIKII <b>EF</b> GQARQL |
| Oryctolagus_cuniculus      | CVETSSKKT <b>FMAK</b> FVKVKGTDQVLVK | .... VIKII <b>EF</b> GQARQL |
| Oryzias_latipes_A          | CVEIATKKT <b>FMAK</b> FIKVKGTDRELV  | .... NIKII <b>DM</b> GQSRLL |
| Oryzias_latipes_B          | CVNISSEKT <b>YMAK</b> FVKVKGADQAIK  | .... NVKII <b>EL</b> GQSRHL |
| Otolemur_garnettii         | CVETSSKKT <b>YMAK</b> FVKVKGTDQVLVK | .... TIKII <b>EF</b> GQARQL |
| Pelodiscus_sinensis        | CVETVSKKT <b>FLAK</b> FVKVKGADQVLVK | .... IIKII <b>EF</b> GQARQL |
| Petromyzon_marinus         | CVEISSKKT <b>YMAK</b> FAKVKGADQGSK  | .... RVKLV <b>EF</b> GQARIL |
| Pongo_abelii               | CVETSSKKT <b>YMAK</b> FVKVKGTDQVLVK | .... TIKII <b>EF</b> GQARQL |
| Procavia_capensis          | CVETSSKKT <b>YMAK</b> FVKVKGTDQVLVK | .... TIKII <b>EF</b> GQARQL |
| Pteropus_vampyrus          | CVETSSKKT <b>YMAK</b> FVKVKGTDQVLVK | .... TIKII <b>EF</b> GQARQL |
| Rattus_norvegicus          | CVETSSKKT <b>FMAK</b> FVKVKGTDQVLVK | .... IIKII <b>EF</b> GQARQL |
| Sarcophilus_harrisii       | CVETSSKKT <b>YMAK</b> FVKVKGTDQVLVK | .... VIKII <b>EF</b> GQARQL |
| Sorex_araneus              | CVETSSKKT <b>YMAK</b> FVKVKGTDQVLVK | .... LIKII <b>EF</b> GQARQL |
| Sus_scrofa                 | CVETSSKKT <b>YMAK</b> FVKVKGADQVLVK | .... TIKII <b>EF</b> GQARQL |
| Takifugu_rubripes_A        | CVEIATKKT <b>FMAK</b> FIKVKGTDRELV  | .... NIKII <b>EM</b> GQARLL |
| Takifugu_rubripes_B        | CVDICSEKT <b>YMAK</b> FVKVKGADQALVK | .... NVKII <b>EL</b> GQCRHL |
| Tetraodon_nigroviridis_A   | CVEIATKRT <b>FMAK</b> FIKVKGTDRELV  | .... TIKII <b>EM</b> GQARLL |
| Tupaia_belangeri           | CVETSSKKT <b>YMAK</b> FVKVKGTDQVLVK | .... TIKII <b>EF</b> GQARQL |
| Xenopus_tropicalis         | CIENSSKKT <b>YLA</b> KFVKVKGADQVLVK | .... TIKIT <b>EF</b> GQARQL |
| Cricetulus_griseus         | CVETSSKKT <b>FMAK</b> FVKVKGTDQVLVK | .... TIKII <b>EF</b> GQARQL |
| Mustela_putorius_furo      | CVETSSKKT <b>YMAK</b> FVKVKGTDQVLVK | .... TIKII <b>EF</b> GQARQL |
| Heterocephalus_glaber      | CVETSSKKT <b>FMAK</b> FVKVKGTDQVLVK | .... IIKII <b>EF</b> GQARQL |
| Xiphophorus_maculatus_A    | CVEIATKKT <b>FMAK</b> FIKVKGTDRELV  | .... NIKMI <b>EM</b> GQSRLL |
| Xiphophorus_maculatus_B    | CVDISSEKT <b>YMAK</b> FVKVKGADQAIK  | .... TVKII <b>EL</b> GQSRHL |

## Invertebrate titin-like kinases (include twitchin, projectin and TTN-1 kinases)

|                           |           |      |       |          |
|---------------------------|-----------|------|-------|----------|
| Caenorhabditis_elegans    | NNFAAKFVM | .... | ELKLI | DFGLTAHL |
| Caenorhabditis_briggsae   | NNFAAKFVM | .... | ELKLI | DFGLTAHL |
| Caenorhabditis_remanei    | NNFAAKFVM | .... | ELKLI | DFGLTAHL |
| Ascaris_suum              | NTFAAKFVN | .... | QLKLI | DFGLAAKL |
| Brugia_malayi             | NTFAAKFVN | .... | QLKLI | DFGLAAKL |
| Loa_loa                   | NTFAAKFVN | .... | QLKLI | DFGLAAKL |
| Trichinella_spiralis      | NVFAAKFVN | .... | VLKLI | DFGLAAKL |
| Tribolium_castaneum       | NIFAAKFIP | .... | NIKLI | DFGLATKL |
| Pediculus_humanus         | SIFAAKFIP | .... | NIKLI | DFGLATKL |
| Procambarus_clarkii       | NIFAAKFIP | .... | NVKLI | DFGLATKL |
| Harpegnathos_saltator     | NIFAAKFIP | .... | NVKLI | DFGLATKL |
| Mytilus_galloprovincialis | RVFVAKFIN | .... | EVKMI | DFGLATKL |
| Crassostrea_gigas         | RVFVAKFIN | .... | NVKMI | DFGLATKL |
| Aplysia_californica       | RVFVAKFIN | .... | SVKLI | DFGLATKL |
| Drosophila_willstoni      | NIFAAKFIP | .... | SVKLI | DFGLATRL |
| Drosophila_pseudoobscura  | NIFAAKFIP | .... | NVKLI | DFGLATRL |
| Drosophila_persimilis     | NIFAAKFIP | .... | NVKLI | DFGLATRL |
| Drosophila_melanogaster   | NIFAAKFIP | .... | NVKLI | DFGLATRL |
| Aedes_aegypti             | NVFAAKFIP | .... | NVKLI | DFGLATRL |
| Anopheles_darlingi        | NVFAAKFIP | .... | NVKLI | DFGLATRL |
| Anopheles_gambiae         | NVFAAKFIP | .... | NVKLI | DFGLATRL |
| Culex_quinquefasciatus    | NVFAAKFIP | .... | NVKLI | DFGLATRL |

## Section S6: Modelling of the hypothesized active conformations of the catalytic domains of twitchin and titin kinases

The crystal structures of TK (PDB: 1tki) and TwcK (PDB: 1kob) kinases were used in this study. The TwcK structure is that from *Aplysia* as this contains a valine residue (instead of alanine) in position 2 of the VAIK motif. This choice was aimed to confirm through modelling the experimental observation that valine at this position does not interfere with ATP-binding and, therefore, catalysis. A BLAST (3) search of the TK and TwcK sequences against the PDB databank showed that the closest available relative in a closed conformation and complexed to ATP/Mg<sup>2+</sup> was death-associated protein kinase 1 (DAPK) (PDB: 1jkl). DAPK shares 38% sequence identity with TK and 41% with TwcK (similarity 61% and 62%, respectively). Thus, DAPK was used here as a template to model the predicted closed conformations of TK and TwcK. Flanking residues were removed from the crystal structures of target and templates to obtain the core kinase domains, so that the CRD tails were not present in the models (models included residues 53-308 in 1KOB and 24-278 in 1TKI; residue numbering as in the respective PDB entries). TK and TwcK were divided into two sequential lobes (split points, 1kob: S131-G132; 1tki: S101-G102, numbering as in the corresponding crystals structures) and each lobe individually rigid-body fitted onto their DAPK counterparts using PyMOL v.1.3 (www.pymol.org). The repositioned lobes were re-annealed using Modeller v9.12 (4). A satisfactory model of TK was obtained in this way. The TwcK model required in addition the slight repositioning of  $\alpha$ C-helix (helix H8 in the TK-like kinase family nomenclature) and residue F64 in the Glycine-rich loop to achieve optimal placement respect to the ATP ligand. The repositioning of  $\alpha$ C-helix (slight lowering) was performed in Modeller by homology to DAPK (and comparatively assessed against TK). Models were checked for Ramachandran plot quality using RAMPAGE (5): the final models contain no residues in outlier regions.

### Fig S6: Open- and closed-lobe conformations of TK and TwcK kinases

Upper: Unbound, open lobe conformations observed in crystals structures. In TwcK and TK, the CRD segment has been removed. (Lower) ATP-bound, closed-lobe conformations modelled using entry 1JKL as template. The ATP molecule and magnesium atoms (green) are displayed as corresponding to the superposition of DAPK (1JKL) and the models calculated. Residues flanking the adenine pocket are shown (purple) and labelled. TwcK shows a regularly shaped ATP-binding pocket with common molecular features, validating the modeling approach. In TK, the ATP-binding pocket does not appear well formed; M34 contributes to that divergence. The M34 rotamer displayed was the only geometry that did not result in clashes with neighbouring TK side chains. (PDB codes are given for experimental structures).

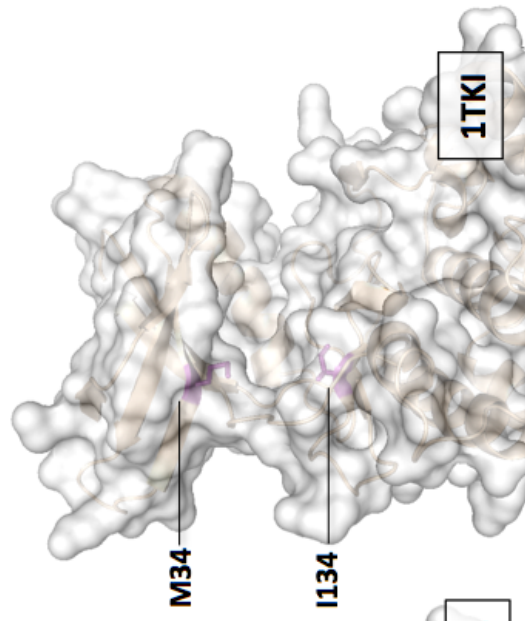

**TK**

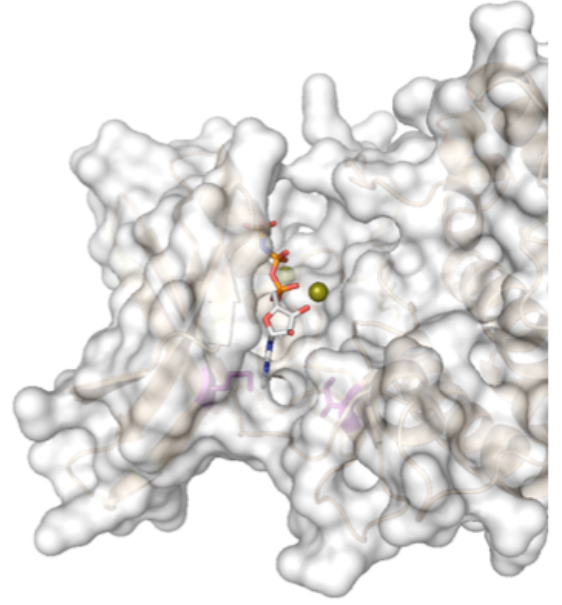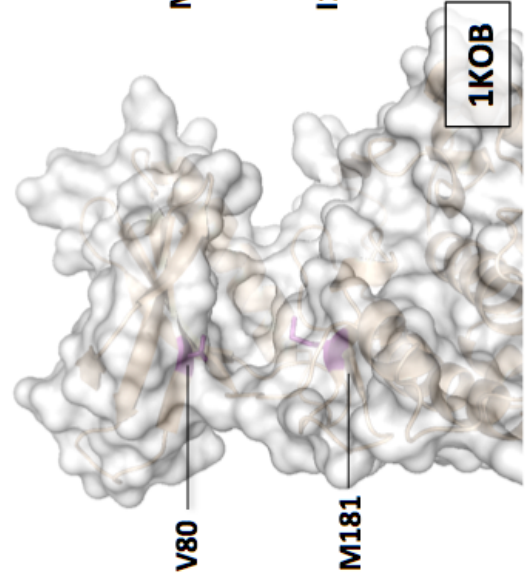

**TwCK**

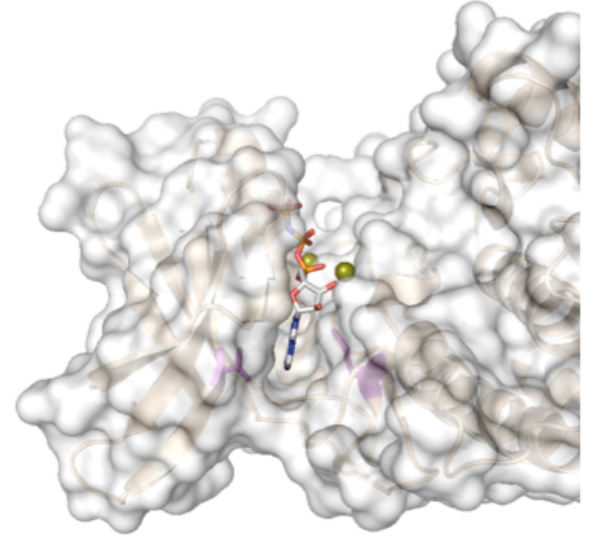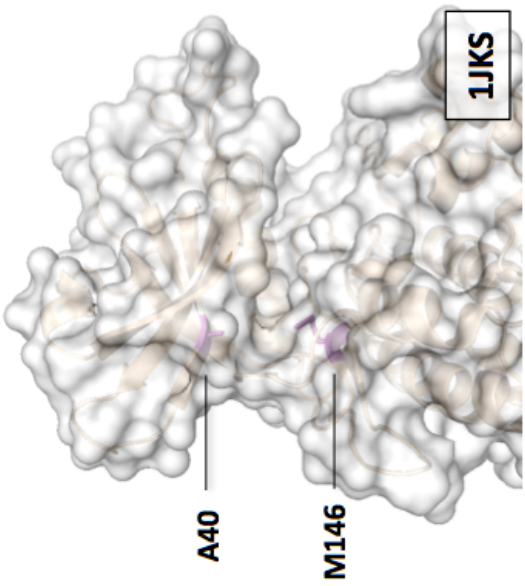

**DAPK**

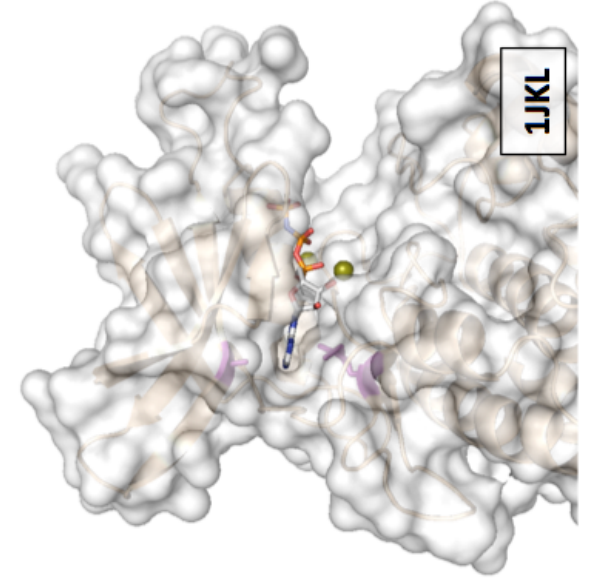

## References

1. Van Durme, J., Delgado, J., Stricher, F., Serrano, L., Schymkowitz, J., Rousseau, F. 2011 A graphical interface for the FoldX forcefield. *Bioinformatics* **27**, 1711-1712.
2. Matulis, D., Kranz, J.K., Salemme, F.R., Todd, M.J. 2005 Thermodynamic stability of carbonic anhydrase: measurements of binding affinity and stoichiometry using ThermoFluor. *Biochemistry* **44**, 5258-5266.
3. Altschul, S.F., Gish, W., Miller, W., Myers, E.W., Lipman, D.J. 1990 Basic local alignment search tool. *J Mol Biol.* **215**, 403-410.
4. Sali, A., Blundell, T.L. 1993 Comparative protein modelling by satisfaction of spatial restraints. *J Mol Biol* **234**, 779-815.
5. Lovell, S.C., Davis, I.W., Arendall III, W.B., de Bakker, P.I.W., Word, J.M., Prisant, M.G., Richardson, J.S., Richardson, D.C. 2002 Structure validation by C $\alpha$  geometry: phi, psi and C $\beta$  deviation. *Prots: Struct, Func & Gen* **50**, 437-450.
